# Supplementary material
Source: PubMed Central journal article supplement (PMC2525679)
Supplement: pbio.0060203.sg002.pdf [file pbio.0060203.sg002.pdf]

**Ace2-HA**

**ace2-S122A-HA**

**ace2-S137A-HA**

**ace2-S436A-HA**

**ace2-2A-HA**

**ace2-S122A/S436A-HA**

**ace2-S137A/S436A-HA**

**ace2-3A-HA**

**ace2-F127V-3A-HA**

**ace2-8Z-HA**

**untagged**

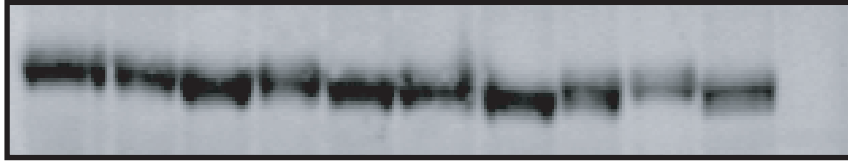

**95 kDa**
