# Supplementary material
Source: PubMed Central journal article supplement (PMC2525679)

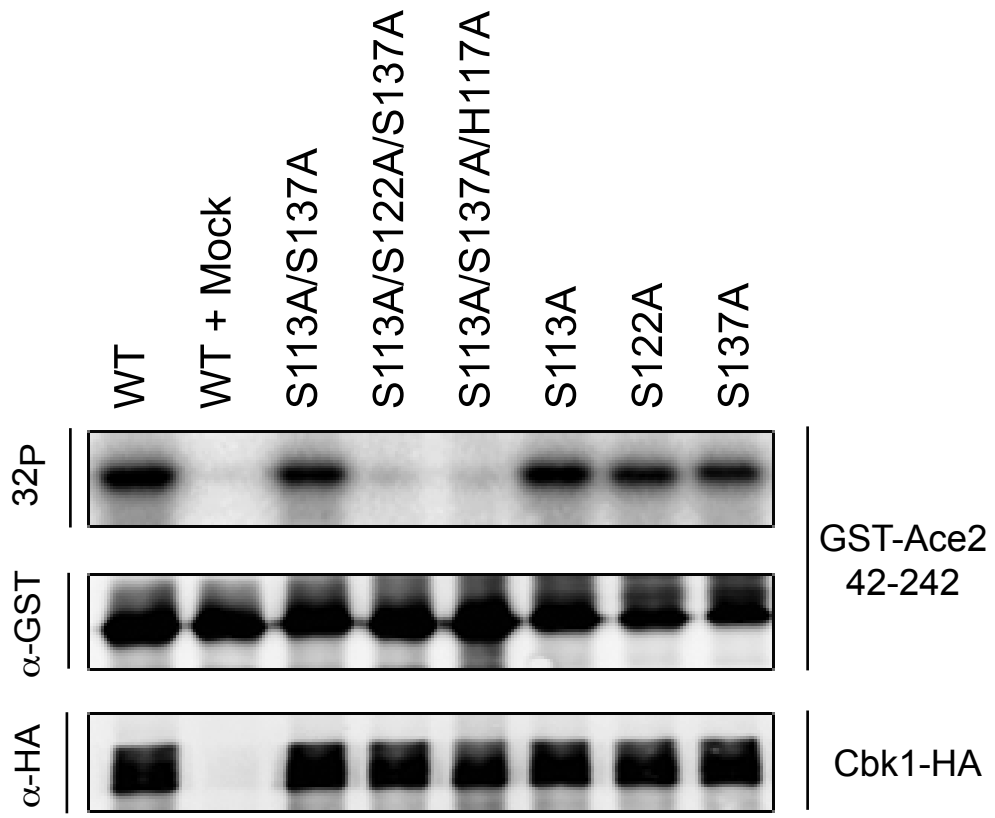

Supplement: pbio.0060203.sg001.pdf [file pbio.0060203.sg001.pdf]

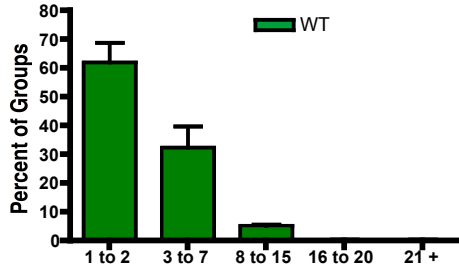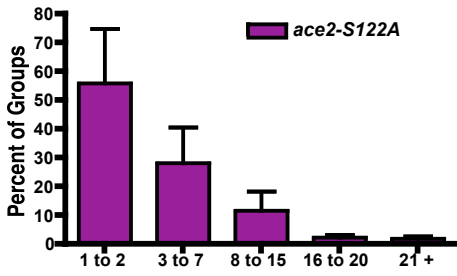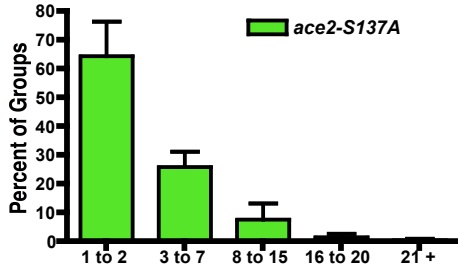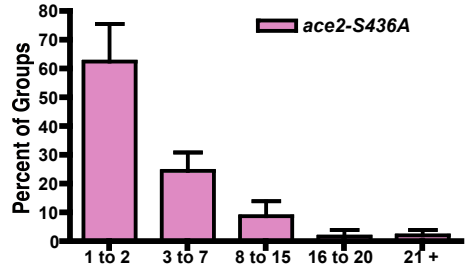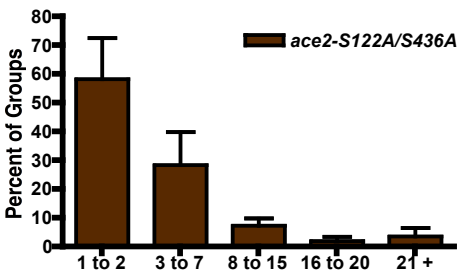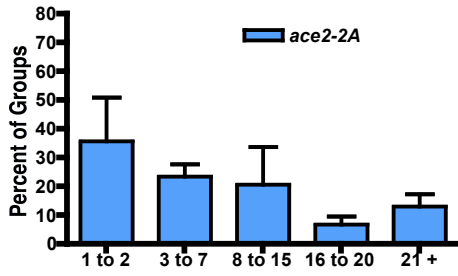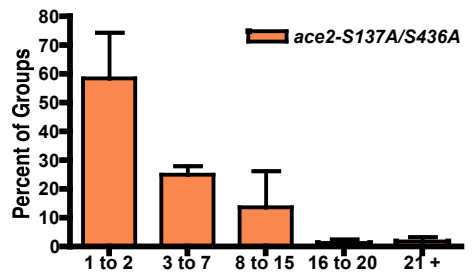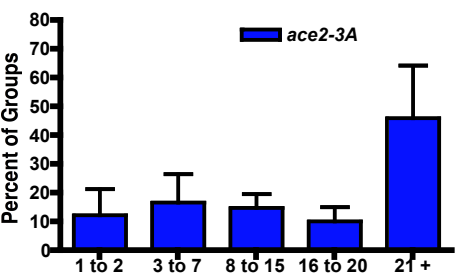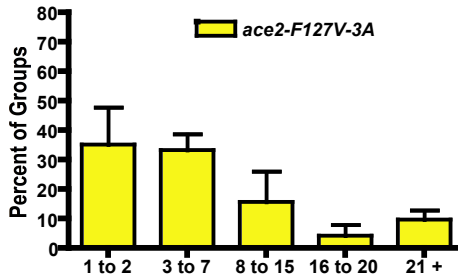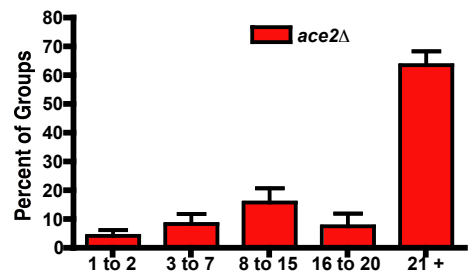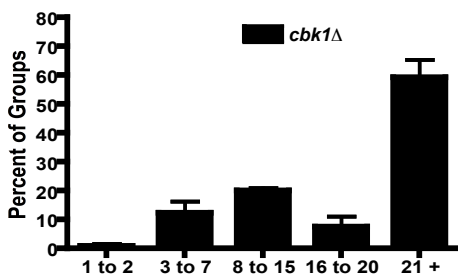

Supplement: pbio.0060203.sg003.pdf [file pbio.0060203.sg003.pdf]

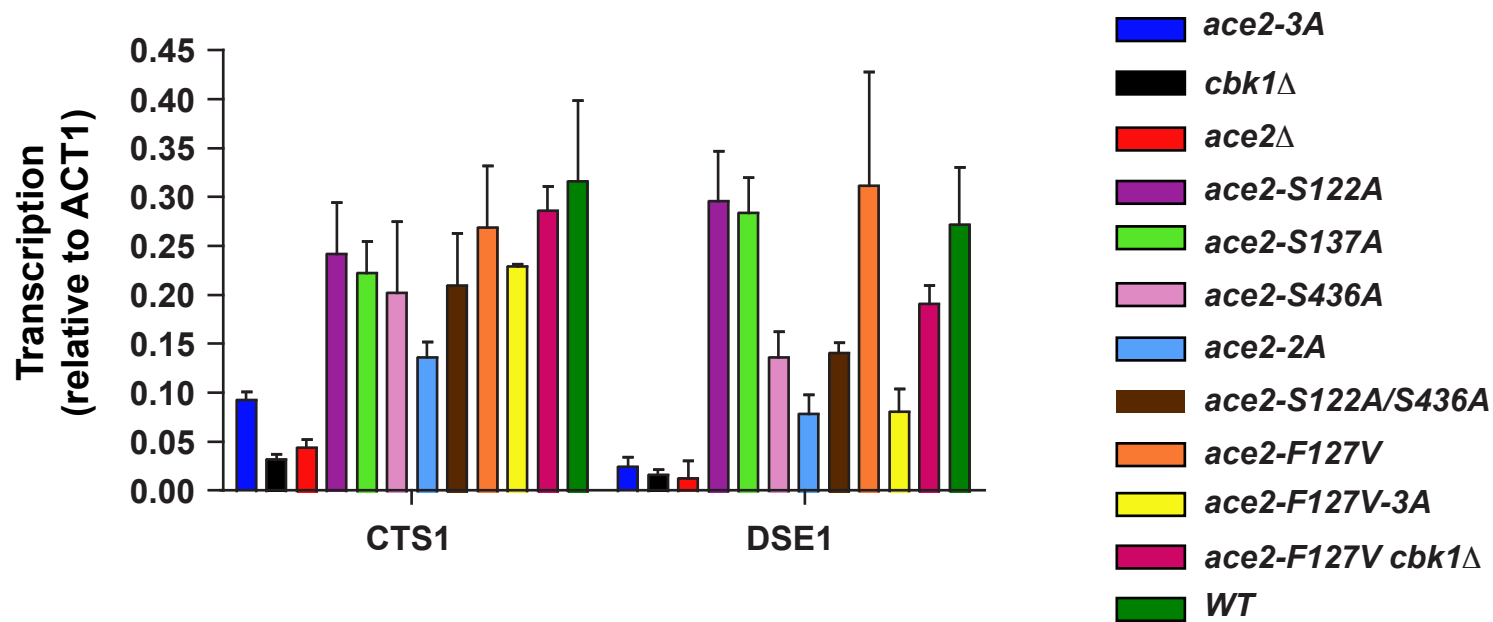

Supplement: pbio.0060203.sg004.pdf [file pbio.0060203.sg004.pdf]

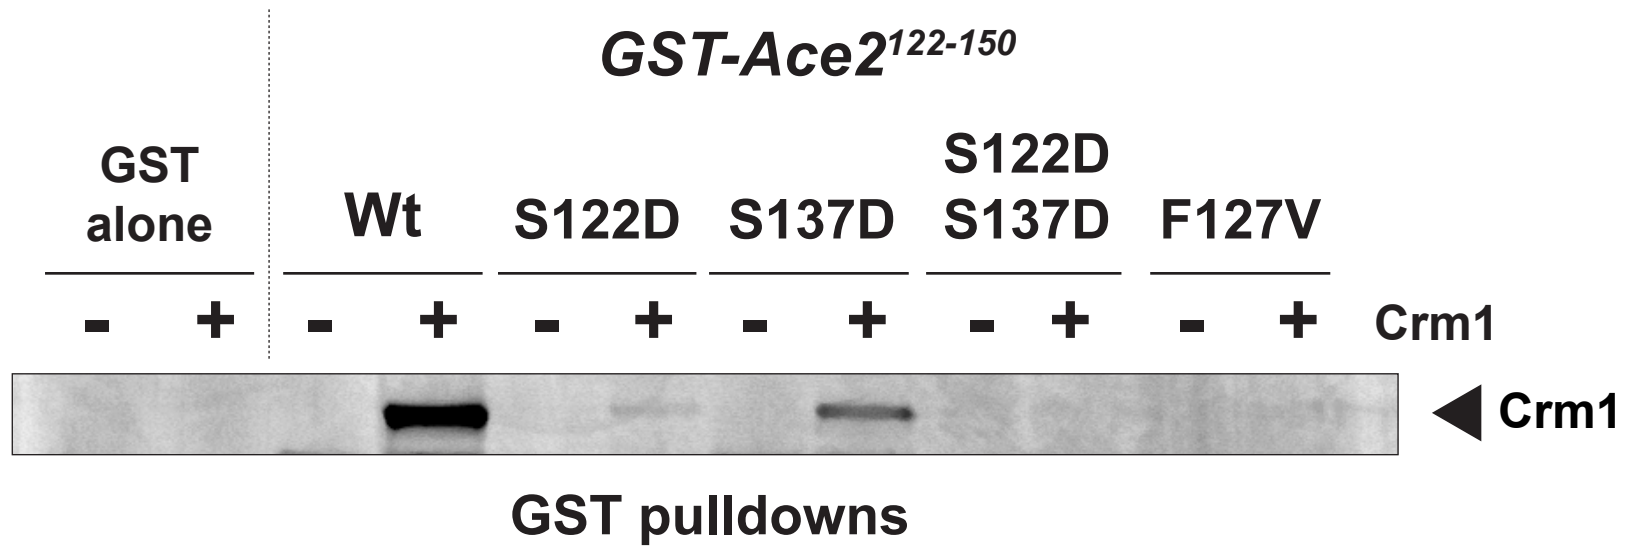

Supplement: pbio.0060203.sg005.pdf [file pbio.0060203.sg005.pdf]
